# Supplementary material
Source: ML conference proceedings conference paper supplement (https://openaccess.thecvf.com/content/CVPR2023/html/Ding_Mitigating_Task_Interference_CVPR_2023_paper.html)
Supplement: Supplementary file 1 [file Ding_Mitigating_Task_Interference_CVPR_2023_supplemental.pdf]

# Mitigating Task Interference in Multi-Task Learning via Explicit Task Routing with Non-Learnable Primitives (Supplementary Materials)

Chuntao Ding<sup>1\*</sup> Zhichao Lu<sup>2†</sup> Shanguang Wang<sup>3</sup> Ran Cheng<sup>4</sup> Vishnu N. Boddeti<sup>5</sup>

<sup>1</sup> Beijing Jiaotong University <sup>2</sup> Sun Yat-sen University <sup>3</sup> Beijing University of Posts and Telecommunications

<sup>4</sup> Southern University of Science and Technology <sup>5</sup> Michigan State University

chuntaoding@163.com {luzhichao, ranchengcn}@gmail.com sgwang@bupt.edu.cn vishnu@msu.edu

This appendix includes the following:

1. Extended description of Related Work in Section A.
2. Additional results of configurations on NLPs-based feature extraction in Section B.
3. Extended description of datasets and baseline methods in Section C.

## A. An Extended Description of Related Work

Existing methods related to MTL architectures can be classified into encoder or decoder-focused ones. Encoder-focused approaches primarily lay emphasis on architectures that can encode multi-purpose feature representations through supervision from multiple tasks. Such encoding is typically achieved, for example, via feature fusion [5, 12, 14], branching [7, 10, 11, 19], self-supervision [3], shared and task-specific modules [8, 13], filter grouping [1], filter modulation [6, 27], task routing [12, 16, 18], or neural architecture search [4]. Decoder-focused approaches start from the feature representations learned at the encoding stage, and further refine them at the decoding stage by distilling information across tasks in a one-off [22], sequential [24], recursive [25], or even multi-scale [20] manner. Due to inherent layer sharing, the approaches above typically suffer from task interference and negative transfer [21].

In the context of MTL, our explicit task routing layer is conceptually related to [8, 13], but notably different in motivation and design. First, both of these two approaches operate on the features obtained from a shared backbone to extract task-specific features. In contrast, our shared and task-specific branches operate in parallel and extract features from the common features extracted by the non-learnable layer. Second, these existing approaches utilize

attention mechanisms to distill task-specific features from the shared features, while we use lightweight  $1 \times 1$  convolution for the same purpose. Third, our explicit task routing layer is tailored to exploit the non-learnable layer for MTL optimally. Finally, unlike baselines, our multi-branch design affords simple and explicit control over the ratio of shared and task-specific parameters.

Additionally, our work is also closely related to reparameterized convolutions for multi-task learning (RCM) [6], which first introduced the concept of using non-learnable convolutional filters for MTL. However, there are three notable differences. First, the non-learnable layer of RCM only includes standard convolution, while we consider other non-learnable primitives such as pooling, identity, and additive noise [23] operations. Second, RCM uses pre-trained network weights to initialize non-learnable convolutional filters, while in our case they are sampled from a random distribution. Relying on pre-trained weights limits RCM's ability to reduce the model size and its generalizability to architectures without readily available pre-trained weights. Finally, there is no collaboration between tasks in RCM as it only comprises task-specific modulators, while we utilize a shared branch to help tasks use each other's training signals. Having both shared and task-specific branches allows tasks to amortize parameters that are commonly useful across multiple tasks, thereby minimizing redundancy in the task-specific branches, unlike RCM. Moreover, our method also offers fine-grained control over the ratio of parameters that are shared or task-specific.

## B. Results of NLPs-based feature extraction

In this section, we first provide the full version of Table 1 from the main paper in Table S1, showing the effect of different configurations of NLPs on CelebA multi-attribute classification. Then, we present the effect of different hyperparameter settings of NLPs on NYU-v2 dense prediction MTL problem in Figure S1.

\*Work done as a visiting scholar at Michigan State University.

†Corresponding author

Table S1. Effect of different configurations of NLPs on CelebA multi-attribute classification.

| Non-learnable Operators        |          |      |       |       | CelebA           |                  |                  |
|--------------------------------|----------|------|-------|-------|------------------|------------------|------------------|
| Avg. pool                      | Max pool | Conv | Shift | Noise | Precision        | Recall           | F-Score          |
|                                |          | ✓    |       |       | 73.37 $\pm$ 0.19 | 59.00 $\pm$ 0.11 | 61.08 $\pm$ 0.17 |
|                                | ✓        |      |       |       | 72.50 $\pm$ 0.13 | 57.87 $\pm$ 0.09 | 61.10 $\pm$ 0.12 |
|                                | ✓        | ✓    |       |       | 72.29 $\pm$ 0.14 | 58.65 $\pm$ 0.27 | 61.30 $\pm$ 0.04 |
| ✓                              |          |      | ✓     |       | 73.24 $\pm$ 0.17 | 58.87 $\pm$ 0.30 | 61.46 $\pm$ 0.13 |
| ✓                              |          | ✓    |       |       | 73.37 $\pm$ 0.31 | 58.67 $\pm$ 0.07 | 61.56 $\pm$ 0.24 |
| ✓                              |          | ✓    |       | ✓     | 72.92 $\pm$ 0.13 | 58.76 $\pm$ 0.08 | 61.57 $\pm$ 0.06 |
| ✓                              |          |      |       | ✓     | 73.51 $\pm$ 0.39 | 59.47 $\pm$ 0.25 | 61.81 $\pm$ 0.15 |
|                                | ✓        |      |       | ✓     | 72.80 $\pm$ 0.33 | 59.39 $\pm$ 0.13 | 61.83 $\pm$ 0.20 |
|                                | ✓        | ✓    |       | ✓     | 72.93 $\pm$ 0.15 | 59.47 $\pm$ 0.15 | 62.04 $\pm$ 0.20 |
|                                |          | ✓    |       | ✓     | 73.56 $\pm$ 0.18 | 59.90 $\pm$ 0.14 | 62.16 $\pm$ 0.07 |
|                                |          | ✓    | ✓     | ✓     | 73.52 $\pm$ 0.62 | 59.16 $\pm$ 0.08 | 62.19 $\pm$ 0.24 |
| ✓                              |          |      | ✓     | ✓     | 74.23 $\pm$ 0.48 | 59.68 $\pm$ 0.17 | 62.36 $\pm$ 0.13 |
| ✓                              |          |      | ✓     | ✓     | 73.97 $\pm$ 0.47 | 59.85 $\pm$ 0.17 | 62.41 $\pm$ 0.08 |
| ✓                              |          |      | ✓     | ✓     | 74.81 $\pm$ 0.39 | 59.84 $\pm$ 0.29 | 62.84 $\pm$ 0.11 |
| ✓                              |          | ✓    |       | ✓     | 74.79 $\pm$ 0.36 | 60.49 $\pm$ 0.05 | 63.03 $\pm$ 0.32 |
| ✓                              | ✓        |      | ✓     | ✓     | 74.56 $\pm$ 0.24 | 61.24 $\pm$ 0.61 | 64.08 $\pm$ 0.21 |
| ✓                              | ✓        |      | ✓     | ✓     | 74.38 $\pm$ 0.10 | 61.13 $\pm$ 0.10 | 64.14 $\pm$ 0.02 |
| ✓                              |          | ✓    | ✓     | ✓     | 74.24 $\pm$ 0.08 | 61.14 $\pm$ 0.29 | 64.21 $\pm$ 0.09 |
| ✓                              |          | ✓    | ✓     | ✓     | 74.50 $\pm$ 0.30 | 61.17 $\pm$ 0.46 | 64.32 $\pm$ 0.04 |
| ✓                              |          | ✓    | ✓     | ✓     | 74.40 $\pm$ 0.32 | 62.07 $\pm$ 0.19 | 64.51 $\pm$ 0.22 |
| ✓                              |          |      | ✓     | ✓     | 75.67 $\pm$ 0.25 | 59.74 $\pm$ 0.33 | 64.54 $\pm$ 0.21 |
| ✓                              | ✓        |      | ✓     | ✓     | 74.39 $\pm$ 0.03 | 62.18 $\pm$ 0.16 | 64.61 $\pm$ 0.15 |
| ✓                              | ✓        |      | ✓     | ✓     | 74.91 $\pm$ 0.14 | 62.16 $\pm$ 0.34 | 64.65 $\pm$ 0.05 |
| ✓                              |          | ✓    | ✓     | ✓     | 75.35 $\pm$ 0.10 | 61.99 $\pm$ 0.20 | 65.03 $\pm$ 0.02 |
| ✓                              | ✓        |      | ✓     | ✓     | 74.61 $\pm$ 0.14 | 61.93 $\pm$ 0.23 | 65.07 $\pm$ 0.05 |
| ✓                              |          | ✓    | ✓     | ✓     | 75.31 $\pm$ 0.22 | 62.89 $\pm$ 0.21 | 65.42 $\pm$ 0.15 |
| ✓                              |          | ✓    | ✓     | ✓     | 75.50 $\pm$ 0.15 | 62.70 $\pm$ 0.41 | 65.65 $\pm$ 0.16 |
| ✓                              |          |      | ✓     | ✓     | 75.74 $\pm$ 0.29 | 62.80 $\pm$ 0.19 | 65.81 $\pm$ 0.13 |
| ✓                              |          |      | ✓     | ✓     | 75.72 $\pm$ 0.08 | 63.19 $\pm$ 0.39 | 66.08 $\pm$ 0.10 |
| ✓                              |          | ✓    | ✓     | ✓     | 75.82 $\pm$ 0.29 | 63.19 $\pm$ 0.36 | 66.26 $\pm$ 0.25 |
| ✓                              |          | ✓    | ✓     | ✓     | 76.29 $\pm$ 0.25 | 62.47 $\pm$ 0.60 | 66.40 $\pm$ 0.32 |
| Standard learnable convolution |          |      |       |       | 67.67 $\pm$ 0.75 | 59.84 $\pm$ 0.33 | 62.86 $\pm$ 0.07 |

### C. Description of Datasets and Baselines

In this section, we first provide the additional details of CelebA and Cityscapes datasets in Table 1 and 2, respectively. Then, we provide a brief overview of the baseline methods that we compared against in this work, as follows:

- STL: single task learning with one network for each task.
- Hard sharing: standard multi-task learning, i.e., a fully shared network with uniform task weighting.
- GradNorm [26]: a MTL method with a fully shared network and learnable tasks weighting.
- MGDA-UB [17]: a multi-objective alternative to MTL with a fully shared network.
- Task Routing [18]: a parameter partitioning method with randomly initialized binary masks.
- Max. Roaming [15]: another parameter partitioning method with dynamic masks.
- Cross-stitch [14]: a soft-sharing method with feature fusion.
- MTAN [8]: another soft-sharing method with attention.

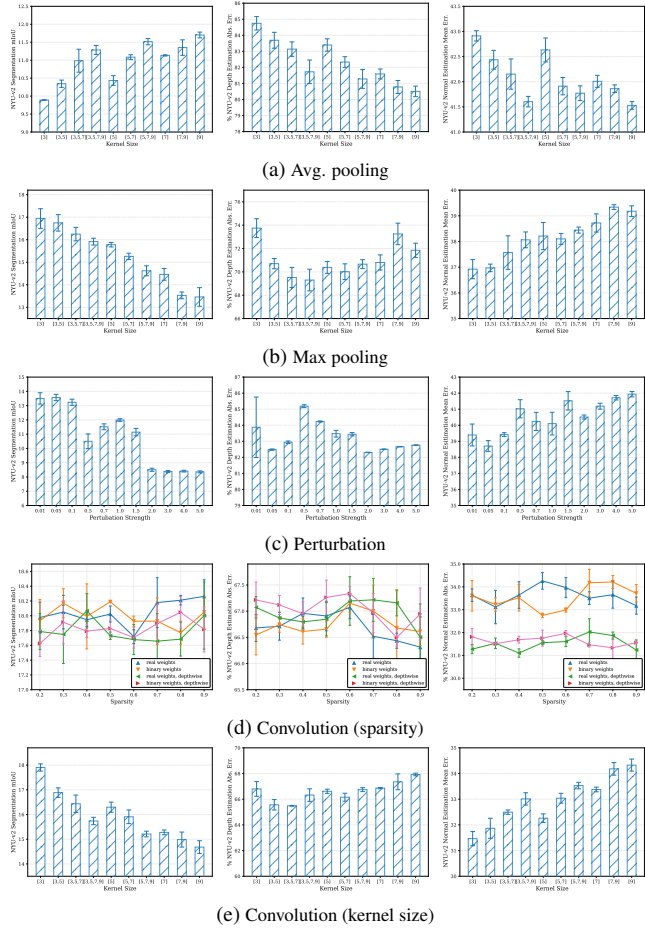

Figure S1. Effect of different hyperparameters of individual NLP on NYU-v2 dense prediction MTL problem. For each sub-figure (a) - (e), we show the semantic segmentation mIoU ( $\uparrow$ ), depth estimation absolute error ( $\downarrow$ ), and surface normal estimation mean error ( $\downarrow$ ).

### References

- [1] Felix JS Bragman, Ryutaro Tanno, Sebastien Ourselin, Daniel C Alexander, and Jorge Cardoso. Stochastic filter groups for multi-task cnns: Learning specialist and generalist convolution kernels. In *International Conference on Computer Vision (ICCV)*, pages 1385–1394, 2019. 1
- [2] Marius Cordts, Mohamed Omran, Sebastian Ramos, Timo Rehfeld, Markus Enzweiler, Rodrigo Benenson, Uwe Franke, Stefan Roth, and Bernt Schiele. The cityscapes dataset for semantic urban scene understanding. In *Proceedings of the IEEE/CVF Conference on Computer Vision and Pattern Recognition*, pages 3213–3223, 2016. 3
- [3] Carl Doersch and Andrew Zisserman. Multi-task self-supervised visual learning. In *IEEE International Conference on Computer Vision (ICCV)*, pages 2070–2079, 2017. 1
- [4] Yuan Gao, Haoping Bai, Zequn Jie, Jiayi Ma, Kui Jia, and Wei Liu. Mtl-nas: Task-agnostic neural architecture

Table 1. Details of the 40 attributes provided by the CelebA dataset [9]. For visualization purposes, we group them into eight categories.

| Group    | 40-attribute                                                                                            |
|----------|---------------------------------------------------------------------------------------------------------|
| global   | attractive, blurry, chubby, double chin, heavy makeup, male, oval face, pale skin, young                |
| eyes     | bags under eyes, eyeglasses, narrow eyes, arched eyebrows, bushy eyebrows                               |
| hair     | bald, bangs, black hair, blond hair, brown hair, gray hair, receding hairline, straight hair, wavy hair |
| mouth    | big lips, mouth slightly open, smiling, wearing lipstick                                                |
| nose     | big nose, pointy nose                                                                                   |
| beard    | 5 o'clock shadow, goatee, mustache, no beard, sideburns                                                 |
| cheek    | high cheekbones, rosy cheeks                                                                            |
| wearings | wearing earrings, wearing hat, wearing necklace, wearing necktie                                        |

Table 2. Three levels of semantic categories for the Cityscapes dataset [2, 8]. The experimental results in this work are based on the 7-class setting.

| 2-class    | 7-class      | 19-class                                             |
|------------|--------------|------------------------------------------------------|
| background | void         | void                                                 |
|            | flat         | road, sidewalk                                       |
|            | construction | building, wall, fence                                |
|            | object       | pole, traffic light, traffic sign                    |
|            | nature       | vegetation, terrain                                  |
| foreground | sky          | sky                                                  |
|            | human        | person, rider                                        |
|            | vehicle      | car, truck, bus, caravan, trailer, train, motorcycle |

search towards general-purpose multi-task learning. In *IEEE Conference on Computer Vision and Pattern Recognition (CVPR)*, pages 11540–11549, 2020. 1

- [5] Yuan Gao, Jiayi Ma, Mingbo Zhao, Wei Liu, and Alan L. Yuille. Nddr-cnn: Layerwise feature fusing in multi-task cnns by neural discriminative dimensionality reduction. In *IEEE Conference on Computer Vision and Pattern Recognition (CVPR)*, pages 3205–3214, 2019. 1
- [6] Menelaos Kanakis, David Bruggemann, Suman Saha, Stamatios Georgoulis, Anton Obukhov, and Luc Van Gool. Reparameterizing convolutions for incremental multi-task learning without task interference. In *European Conference on Computer Vision (ECCV)*, pages 689–707, 2020. 1
- [7] Iasonas Kokkinos. Ubertnet: Training a universal convolutional neural network for low-, mid-, and high-level vision using diverse datasets and limited memory. In *Proceedings of the IEEE/CVF Conference on Computer Vision and Pattern Recognition*, pages 5454–5463, 2017. 1
- [8] Shikun Liu, Edward Johns, and Andrew J Davison. End-to-end multi-task learning with attention. In *Proceedings of the IEEE/CVF Conference on Computer Vision and Pattern Recognition*, pages 1871–1880, 2019. 1, 2, 3
- [9] Ziwei Liu, Ping Luo, Xiaogang Wang, and Xiaoou Tang. Deep learning face attributes in the wild. In *International Conference on Computer Vision (ICCV)*, pages 3730–3738, 2015. 3
- [10] Mingsheng Long and Jianmin Wang. Learning multiple tasks with deep relationship networks, 2015. In CoRR abs/1506.02117. 1
- [11] Yongxi Lu, Abhishek Kumar, Shuangfei Zhai, Yu Cheng, Tara Javidi, and Rogerio Schmidt Feris. Fully-adaptive feature sharing in multi-task networks with applications in person attribute classification. In *IEEE Conference on Computer Vision and Pattern Recognition (CVPR)*, pages 1131–1140, 2017. 1
- [12] Jiaqi Ma, Zhe Zhao, Jilin Chen, Ang Li, Lichan Hong, and Ed H. Chi. Snr: Sub-network routing for flexible parameter sharing in multi-task learning. In *Association for the Advancement of Artificial Intelligence (AAAI)*, pages 216–223, 2019. 1
- [13] Kevis-Kokitsi Maninis, Ilija Radosavovic, and Iasonas Kokkinos. Attentive single-tasking of multiple tasks. In *Proceedings of the IEEE/CVF Conference on Computer Vision and Pattern Recognition*, pages 1851–1860, 2019. 1
- [14] Ishan Misra, Abhinav Shrivastava, Abhinav Gupta, and Martial Hebert. Cross-stitch networks for multi-task learning. In *IEEE Conference on Computer Vision and Pattern Recognition (CVPR)*, pages 3994–4003, 2016. 1, 2
- [15] Lucas Pascal, Pietro Michiardi, Xavier Bost, Benoit Huet, and Maria A Zuluaga. Maximum roaming multi-task learning. In *AAAI Conference on Artificial Intelligence*, pages 9331–9341, 2021. 2
- [16] Clemens Rosenbaum, Tim Klinger, and Matthew Riemer. Routing networks: Adaptive selection of non-linear functions for multi-task learning. In *International Conference on Learning Representations (ICLR)*, 2018. 1
- [17] Ozan Sener and Vladlen Koltun. Multi-task learning as multi-objective optimization. In *Advances in Neural Information Processing Systems (NeurIPS)*, pages 525–536, 2018. 2
- [18] Gjorgji Strezoski, Nanne van Noord, and Marcel Worring. Many task learning with task routing. In *International Conference on Computer Vision (ICCV)*, pages 1375–1384, 2019. 1, 2
- [19] Simon Vandenhende, Bert De Brabandere, and Luc Van Gool. Branched multi-task networks: Deciding what layers to share, 2019. In *British Machine Vision Conference (BMVC)*. 1
- [20] Simon Vandenhende, Stamatios Georgoulis, and Luc Van Gool. Mti-net: Multi-scale task interaction networks for multi-task learning. In *European Conference on Computer Vision (ECCV)*, pages 527–543, 2020. 1
- [21] Sen Wu, Hongyang R. Zhang, and Christopher Re. Understanding and improving information transfer in multi-task learning. In *International Conference on Learning Representations (ICLR)*, 2020. 1
- [22] Dan Xu, Wanli Ouyang, Xiaogang Wang, and Nicu Sebe. Pad-net: Multi-tasks guided prediction-and-distillation network for simultaneous depth estimation and scene parsing.

- In *IEEE Conference on Computer Vision and pattern Recognition (CVPR)*, pages 675–684, 2018. 1
- [23] Felix Juefei Xu, Vishnu Naresh Boddeti, and Marios Savvides. Perturbative neural networks. In *Proceedings of the IEEE/CVF Conference on Computer Vision and Pattern Recognition*, pages 3310–3318, 2018. 1
- [24] Zhenyu Zhang, Zhen Cui, Chunyan Xu, Zequn Jie, Xiang Li, and Jian Yang. Joint task-recursive learning for semantic segmentation and depth estimation. In *European Conference on Computer Vision (ECCV)*, pages 235–251, 2018. 1
- [25] Zhenyu Zhang, Zhen Cui, Chunyan Xu, Yan Yan, Nicu Sebe, and Jian Yang. Pattern-affinitive propagation across depth, surface normal and semantic segmentation. In *IEEE Conference on Computer Vision and pattern Recognition (CVPR)*, pages 4106–4115, 2019. 1
- [26] Chen Zhao, Badrinarayanan Vijay, Lee Chen-Yu, and Rabinovich Andrew. Gradnorm: Gradient normalization for adaptive loss balancing in deep multitask networks. In *International Conference on Machine Learning (ICML)*, pages 793–802, 2018. 2
- [27] Xiangyun Zhao, Haoxiang Li, Xiaohui Shen, Xiaodan Liang, and Ying Wu. A modulation module for multi-task learning with applications in image retrieval. In *European Conference on Computer Vision (ECCV)*, pages 415–432, 2018. 1
